# Supplementary material for: A plant-based diet index and all-cause and cause-specific mortality: a prospective study
Source: Royal Society of Chemistry journal article supplement (doi:10.1039/d4fo04242e), 2024-12-27
Supplement: d4fo04242e1.pdf [file d4fo04242e1.pdf]

**Supplementary Table 1 Construction and score of plant-based diet indices**

| <b>Food groups</b>                    | <b>PDI</b>      | <b>hPDI</b>     | <b>uPDI</b>     |
|---------------------------------------|-----------------|-----------------|-----------------|
| <b>Healthy plant-based foods</b>      |                 |                 |                 |
| Whole grains                          | Positive scores | Positive scores | Reverse scores  |
| Fruits                                | Positive scores | Positive scores | Reverse scores  |
| Vegetables                            | Positive scores | Positive scores | Reverse scores  |
| Nuts                                  | Positive scores | Positive scores | Reverse scores  |
| Legumes                               | Positive scores | Positive scores | Reverse scores  |
| Vegetable oils                        | Positive scores | Positive scores | Reverse scores  |
| Tea and coffee                        | Positive scores | Positive scores | Reverse scores  |
| <b>Less healthy plant-based foods</b> |                 |                 |                 |
| Fruit juices                          | Positive scores | Reverse scores  | Positive scores |
| Refined grains                        | Positive scores | Reverse scores  | Positive scores |
| Potatoes                              | Positive scores | Reverse scores  | Positive scores |
| Sugar sweetened beverages             | Positive scores | Reverse scores  | Positive scores |
| Sweets and desserts                   | Positive scores | Reverse scores  | Positive scores |
| <b>Animal foods</b>                   |                 |                 |                 |
| Animal fat                            | Reverse scores  | Reverse scores  | Reverse scores  |
| Dairy                                 | Reverse scores  | Reverse scores  | Reverse scores  |
| Eggs                                  | Reverse scores  | Reverse scores  | Reverse scores  |
| Fish and seafood                      | Reverse scores  | Reverse scores  | Reverse scores  |
| Meat                                  | Reverse scores  | Reverse scores  | Reverse scores  |
| Miscellaneous animal-based foods      | Reverse scores  | Reverse scores  | Reverse scores  |
| <b>Total Score</b>                    | <b>18-90</b>    | <b>18-90</b>    | <b>18-90</b>    |

Abbreviations: PDI, plant-based diet index; hPDI, healthful plant-based diet index; uPDI unhealthful plant-based diet index.
