# Supplementary material for: A plant-based diet index and all-cause and cause-specific mortality: a prospective study
Source: Royal Society of Chemistry journal article supplement (doi:10.1039/d4fo04242e), 2024-12-27
Supplement: d4fo04242e2.pdf [file d4fo04242e2.pdf]

**Supplementary Table 2 Main characteristics of participants included in this study by hPDI in Prostate, Lung, Colorectal and Ovarian (PLCO) Screening Trial.**

| Variables                | Q1<br>(n=20160)  | Q2<br>(n=18273)  | Q3<br>(n=20349)  | Q4<br>(n=16852)  | Q5<br>(n=15780)  | P value |
|--------------------------|------------------|------------------|------------------|------------------|------------------|---------|
| Age (y), mean (SD)       | 61.2 (5.0)       | 61.9 (5.2)       | 62.4 (5.2)       | 62.7 (5.3)       | 63.0 (5.3)       | < 0.001 |
| Sex (n, %)               |                  |                  |                  |                  |                  |         |
| Male                     | 12861<br>(63.8%) | 9253<br>(50.6%)  | 8946<br>(44.0%)  | 6202<br>(36.8%)  | 4926<br>(31.2%)  | < 0.001 |
| Female                   | 7299<br>(36.2%)  | 9020<br>(49.4%)  | 11403<br>(56.0%) | 10650<br>(63.2%) | 10854<br>(68.8%) |         |
| Arm (n, %)               |                  |                  |                  |                  |                  |         |
| Screen                   | 10238<br>(50.8%) | 9225<br>(50.5%)  | 10331<br>(50.8%) | 8565<br>(50.8%)  | 8285<br>(52.5%)  | 0.002   |
| Control                  | 9922<br>(49.2%)  | 9048<br>(49.5%)  | 10018<br>(49.2%) | 8287<br>(49.2%)  | 7495<br>(47.5%)  |         |
| Smoking status (n, %)    |                  |                  |                  |                  |                  |         |
| Never                    | 9391<br>(46.6%)  | 8766<br>(48.0%)  | 10035<br>(49.3%) | 8560<br>(50.8%)  | 8135<br>(51.6%)  | < 0.001 |
| Current                  | 2499<br>(12.4%)  | 1833<br>(10.0%)  | 1794<br>(8.8%)   | 1244<br>(7.4%)   | 1029<br>(6.5%)   |         |
| Former                   | 8267<br>(41.0%)  | 7666<br>(42.0%)  | 8517<br>(41.9%)  | 7046<br>(41.8%)  | 6612<br>(41.9%)  |         |
| Drinking status (n, %)   |                  |                  |                  |                  |                  |         |
| Never                    | 1784<br>(8.8%)   | 1742<br>(9.5%)   | 2006<br>(9.9%)   | 1808<br>(10.7%)  | 1871<br>(11.9%)  | < 0.001 |
| Current                  | 2763<br>(13.7%)  | 2434<br>(13.3%)  | 2736<br>(13.4%)  | 2308<br>(13.7%)  | 2480<br>(15.7%)  |         |
| Former                   | 15178<br>(75.3%) | 13639<br>(74.6%) | 15097<br>(74.2%) | 12224<br>(72.5%) | 10841<br>(68.7%) |         |
| Education (n, %)         |                  |                  |                  |                  |                  |         |
| High school and below    | 6138<br>(30.4%)  | 5261<br>(28.8%)  | 5788<br>(28.4%)  | 4803<br>(28.5%)  | 4406<br>(27.9%)  | < 0.001 |
| Undergraduate            | 6970<br>(34.6%)  | 6226<br>(34.1%)  | 6991<br>(34.4%)  | 5739<br>(34.1%)  | 5377<br>(34.1%)  |         |
| Graduate and above       | 7019<br>(34.8%)  | 6756<br>(37.0%)  | 7528<br>(37.0%)  | 6269<br>(37.2%)  | 5963<br>(37.8%)  |         |
| BMI (n, %)               |                  |                  |                  |                  |                  |         |
| < 25.0 kg/m <sup>2</sup> | 5075<br>(25.2%)  | 5637<br>(30.8%)  | 7166<br>(35.2%)  | 6616<br>(39.3%)  | 7245<br>(45.9%)  | < 0.001 |
| ≥ 25.0 kg/m <sup>2</sup> | 14826<br>(73.5%) | 12399<br>(67.9%) | 12904<br>(63.4%) | 10004<br>(59.4%) | 8336<br>(52.8%)  |         |
| Race (n, %)              |                  |                  |                  |                  |                  |         |
| White, Non-Hispanic      | 18963<br>(94.1%) | 17022<br>(93.2%) | 18599<br>(91.4%) | 15043<br>(89.3%) | 13517<br>(85.7%) | < 0.001 |

|                                                |                   |                   |                   |                   |                   |         |
|------------------------------------------------|-------------------|-------------------|-------------------|-------------------|-------------------|---------|
| Other                                          | 1193<br>(5.9%)    | 1243<br>(6.8%)    | 1744<br>(8.6%)    | 1800<br>(10.7%)   | 2257<br>(14.3%)   |         |
| Marital status (n, %)                          |                   |                   |                   |                   |                   |         |
| Married                                        | 16417<br>(81.4%)  | 14636<br>(80.1%)  | 15916<br>(78.2%)  | 12902<br>(76.6%)  | 11600<br>(73.5%)  | < 0.001 |
| Not married                                    | 3715<br>(18.4%)   | 3604<br>(19.7%)   | 4393<br>(21.6%)   | 3915<br>(23.2%)   | 4146<br>(26.3%)   |         |
| Total energy intake<br>(kcal/d), mean $\pm$ SD | 2221.1<br>(741.6) | 1847.9<br>(666.0) | 1636.2<br>(611.4) | 1467.3<br>(571.8) | 1337.1<br>(508.1) | < 0.001 |

---

hPDI, healthy plant-based diet index; y, year; SD, standard deviation; BMI, body mass index
