# Supplementary material for: A plant-based diet index and all-cause and cause-specific mortality: a prospective study
Source: Royal Society of Chemistry journal article supplement (doi:10.1039/d4fo04242e), 2024-12-27
Supplement: d4fo04242e3.pdf [file d4fo04242e3.pdf]

**Supplementary Table 3 Main characteristics of participants included in this study by uPDI in Prostate, Lung, Colorectal and Ovarian (PLCO) Screening Trial.**

| Variables                | Q1<br>(n=18458)  | Q2<br>(n=22459)  | Q3<br>(n=15199)  | Q4<br>(n=17200)  | Q5<br>(n=18098)  | P value |
|--------------------------|------------------|------------------|------------------|------------------|------------------|---------|
| Age (y), mean (SD)       | 62.0 (5.1)       | 62.2 (5.2)       | 62.3 (5.2)       | 62.3 (5.2)       | 62.2 (5.4)       | < 0.001 |
| Sex (n, %)               |                  |                  |                  |                  |                  |         |
| Male                     | 9182<br>(49.7%)  | 10758<br>(47.9%) | 7029<br>(46.2%)  | 7649<br>(44.5%)  | 7570<br>(41.8%)  | < 0.001 |
| Female                   | 9276<br>(50.3%)  | 11701<br>(52.1%) | 8170<br>(53.8%)  | 9551<br>(55.5%)  | 10528<br>(58.2%) |         |
| Arm (n, %)               |                  |                  |                  |                  |                  |         |
| Screen                   | 9895<br>(53.6%)  | 11514<br>(51.3%) | 7802<br>(51.3%)  | 8594<br>(50.0%)  | 8839<br>(48.8%)  | < 0.001 |
| Control                  | 8563<br>(46.4%)  | 10945<br>(48.7%) | 7397<br>(48.7%)  | 8606<br>(50.0%)  | 9259<br>(51.2%)  |         |
| Smoking status (n, %)    |                  |                  |                  |                  |                  |         |
| Never                    | 8325<br>(45.1%)  | 10777<br>(48.0%) | 7489<br>(49.3%)  | 8738<br>(50.8%)  | 9558<br>(52.8%)  | < 0.001 |
| Current                  | 1587<br>(8.6%)   | 1989<br>(8.9%)   | 1409<br>(9.3%)   | 1597<br>(9.3%)   | 1817<br>(10.0%)  |         |
| Former                   | 8539<br>(46.3%)  | 9688<br>(43.1%)  | 6298<br>(41.4%)  | 6860<br>(39.9%)  | 6723<br>(37.1%)  |         |
| Drinking status (n, %)   |                  |                  |                  |                  |                  |         |
| Never                    | 1340<br>(7.3%)   | 1934<br>(8.6%)   | 1512<br>(9.9%)   | 1938<br>(11.3%)  | 2487<br>(13.7%)  | < 0.001 |
| Current                  | 2241<br>(12.1%)  | 2940<br>(13.1%)  | 2069<br>(13.6%)  | 2507<br>(14.6%)  | 2964<br>(16.4%)  |         |
| Former                   | 14474<br>(78.4%) | 17075<br>(76.0%) | 11202<br>(73.7%) | 12259<br>(71.3%) | 11969<br>(66.1%) |         |
| Education (n, %)         |                  |                  |                  |                  |                  |         |
| High school and below    | 4549<br>(24.6%)  | 6114<br>(27.2%)  | 4324<br>(28.4%)  | 5202<br>(30.2%)  | 6207<br>(34.3%)  | < 0.001 |
| Undergraduate            | 6271<br>(34.0%)  | 7700<br>(34.3%)  | 5279<br>(34.7%)  | 5870<br>(34.1%)  | 6183<br>(34.2%)  |         |
| Graduate and above       | 7605<br>(41.2%)  | 8597<br>(38.3%)  | 5565<br>(36.6%)  | 6096<br>(35.4%)  | 5672<br>(31.3%)  |         |
| BMI (n, %)               |                  |                  |                  |                  |                  |         |
| < 25.0 kg/m <sup>2</sup> | 5958<br>(32.3%)  | 7707<br>(34.3%)  | 5359<br>(35.3%)  | 6109<br>(35.5%)  | 6606<br>(36.5%)  | < 0.001 |
| ≥ 25.0 kg/m <sup>2</sup> | 12255<br>(66.4%) | 14463<br>(64.4%) | 9639<br>(63.4%)  | 10882<br>(63.3%) | 11230<br>(62.1%) |         |
| Race (n, %)              |                  |                  |                  |                  |                  |         |
| White, Non-Hispanic      | 17003<br>(92.1%) | 20645<br>(91.9%) | 13897<br>(91.4%) | 15555<br>(90.4%) | 16044<br>(88.7%) | < 0.001 |

|                                                |                   |                   |                   |                   |                   |         |
|------------------------------------------------|-------------------|-------------------|-------------------|-------------------|-------------------|---------|
| Other                                          | 1446<br>(7.8%)    | 1807<br>(8.0%)    | 1298<br>(8.5%)    | 1639<br>(9.5%)    | 2047<br>(11.3%)   |         |
| Marital status (n, %)                          |                   |                   |                   |                   |                   |         |
| Married                                        | 14605<br>(79.1%)  | 17904<br>(79.7%)  | 12005<br>(79.0%)  | 13385<br>(77.8%)  | 13572<br>(75.0%)  | < 0.001 |
| Not married                                    | 3818<br>(20.7%)   | 4509<br>(20.1%)   | 3164<br>(20.8%)   | 3782<br>(22.0%)   | 4500<br>(24.9%)   |         |
| Total energy intake<br>(kcal/d), mean $\pm$ SD | 2189.2<br>(726.3) | 1869.1<br>(665.8) | 1674.0<br>(625.2) | 1514.3<br>(583.4) | 1314.4<br>(550.6) | < 0.001 |

---

uPDI, unhealthy plant-based diet index; y, year; SD, standard deviation; BMI, body mass index
