# Supplementary material for: A plant-based diet index and all-cause and cause-specific mortality: a prospective study
Source: Royal Society of Chemistry journal article supplement (doi:10.1039/d4fo04242e), 2024-12-27
Supplement: d4fo04242e4.pdf [file d4fo04242e4.pdf]

**Supplementary Table 4 Associations of all-cause, CVD or cancer-specific mortality with PDI after excluding deaths in the first 3-years of follow up**

|           | All-cause        | CVD              | Cancer           |
|-----------|------------------|------------------|------------------|
| <b>Q1</b> | Reference        | Reference        | Reference        |
| <b>Q2</b> | 0.94 (0.90-0.98) | 1.01 (0.93-1.10) | 0.98 (0.90-1.05) |
| <b>Q3</b> | 0.89 (0.85-0.93) | 0.92 (0.85-0.99) | 0.91 (0.84-0.98) |
| <b>Q4</b> | 0.86 (0.82-0.90) | 0.89 (0.81-0.97) | 0.93 (0.85-1.01) |
| <b>Q5</b> | 0.83 (0.80-0.87) | 0.87 (0.80-0.95) | 0.89 (0.82-0.97) |

CVD, cardiovascular disease; PDI, plant-based diet index.

\* Adjusted for arm, age, sex, and total energy intake, race/ethnicity, education, marital status, smoking, alcohol drinking, BMI, histories of diabetes and hypertension at baseline.
